# Supplementary material for: Electrodeposition of crystalline silicon directly from silicon tetrachloride in ionic liquid at low temperature
Source: Royal Society of Chemistry journal article supplement (doi:10.1039/c5ra23085c), 2016-01-01
Supplement: c5ra23085c1.pdf [file c5ra23085c1.pdf]

Supporting Information

**Electrodeposition of crystalline silicon directly from silicon tetrachloride in ionic liquid at low temperature**

*Junling Zhang, Shimou Chen, Haitao Zhang, Xue Yao, Zhaohui Shi and Suojiang Zhang\**

*Beijing Key Laboratory of Ionic Liquids Clean Process, Key Laboratory of Green Process and Engineering, State Key Laboratory of Multiphase Complex Systems, Institute of Process Engineering, Chinese Academy of Sciences, Beijing 100190, China*

\*Corresponding author: [sjzhang@ipe.ac.cn](mailto:sjzhang@ipe.ac.cn)

**Table S1** Comparison of the viscosity of ILs consisting of EMIM cation and different anions (25 °C, 0.1M Pa)

| Ionic liquids        | $\eta$<br>(mPa·s) | Testing instrument             | Ref. |
|----------------------|-------------------|--------------------------------|------|
| EMIM PF <sub>6</sub> | 450               | Cole-Parmer 98936 viscometer   | [S1] |
| EMIM BF <sub>4</sub> | 219               | Cole-Parmer 98936 viscometer   | [S1] |
| EMIM TFO             | 76.9              | Anton Paar SVM-3000            | [S2] |
| EMIM SCN             | 54                | --                             | [S3] |
| EMIM TFSI            | 50.7              | Micro Ubbelohde viscometers    | [S4] |
| EMIM DCA             | 37                | Ubbelohde viscosimeter AVS-440 | [S5] |

**Table S2** Comparison of the viscosity of [N<sub>4441</sub>][TFSI] measured in this work with literature values (0.1M Pa)

| Temperature (°C) | $\eta$ (mPa·s) |            | Ref. |
|------------------|----------------|------------|------|
|                  | This work      | Literature |      |
| 25               | 577.9          | –          |      |
| 30               | –              | 386        | [S6] |
| 50               | 114.1          | –          |      |
| 60               | 64.8           | –          |      |
| 80               | 30.6           | –          |      |

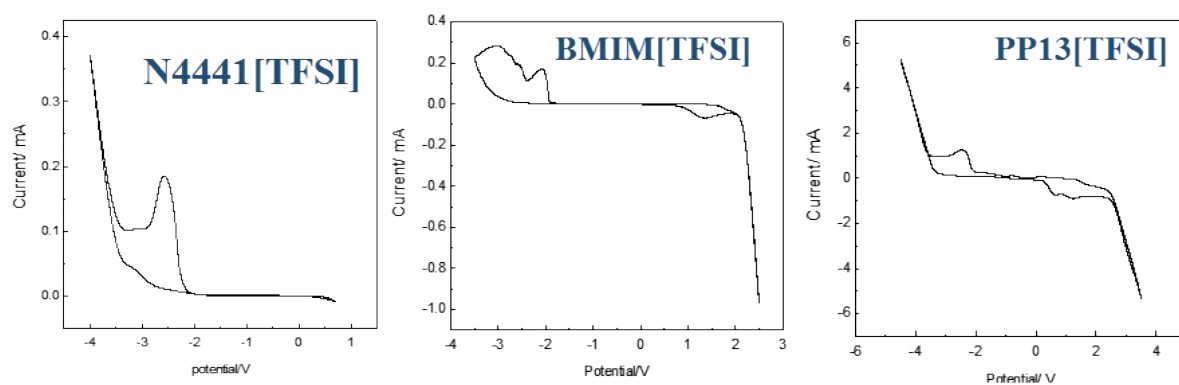

**Fig. S1** CV curves of  $\text{SiCl}_4$  in three different ionic liquids on copper electrode as indicated

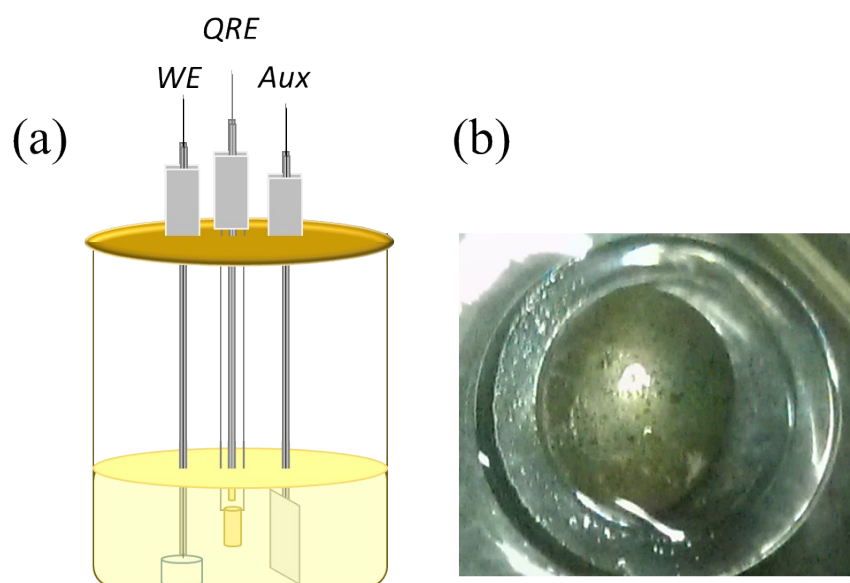

**Fig. S2** (a) Schematic illustration of electrodeposition experiments and (b) Ga electrode with deposited silicon

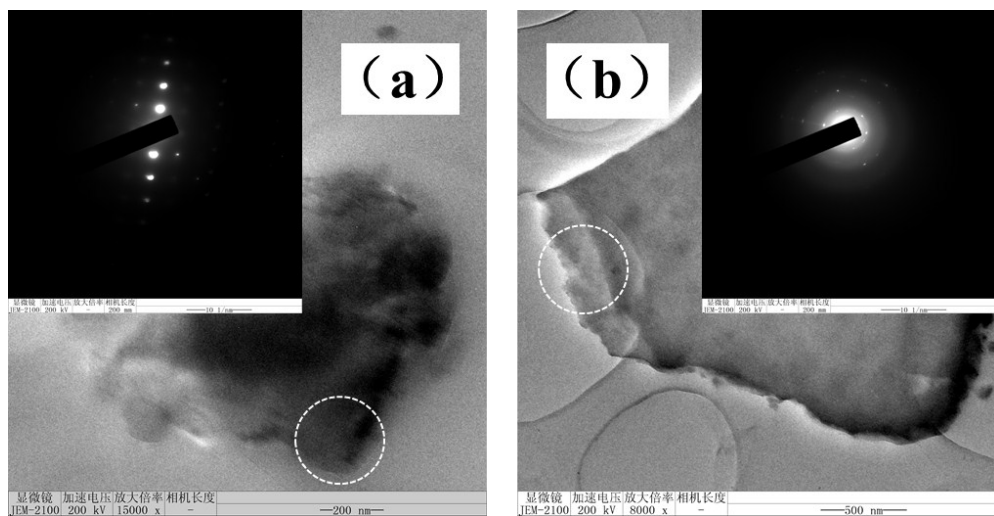

**Fig. S3** TEM and SAED images of (a) the particle side and (b) film side of the deposits prepared at -2.3 V (vs. Ag QRE) at 100 °C for 2 h

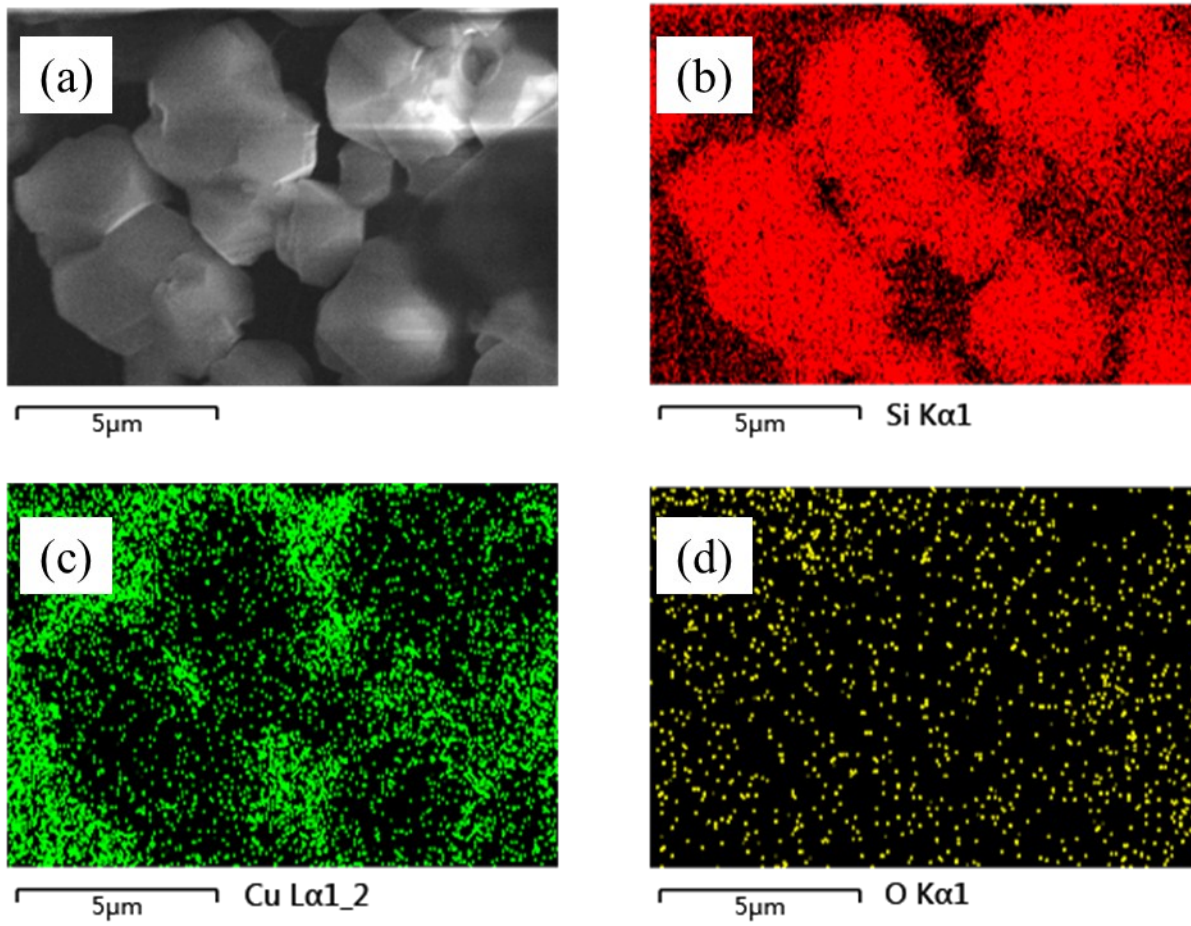

**Fig. S4** (a) SEM and corresponding EDS elemental (b, Si; c, Cu; d, O) mapping images of the Si deposited on static Ga (*l*) electrode at -2.3 V (*vs.* Ag QRE). The Cu as conductive adhesive for SEM test

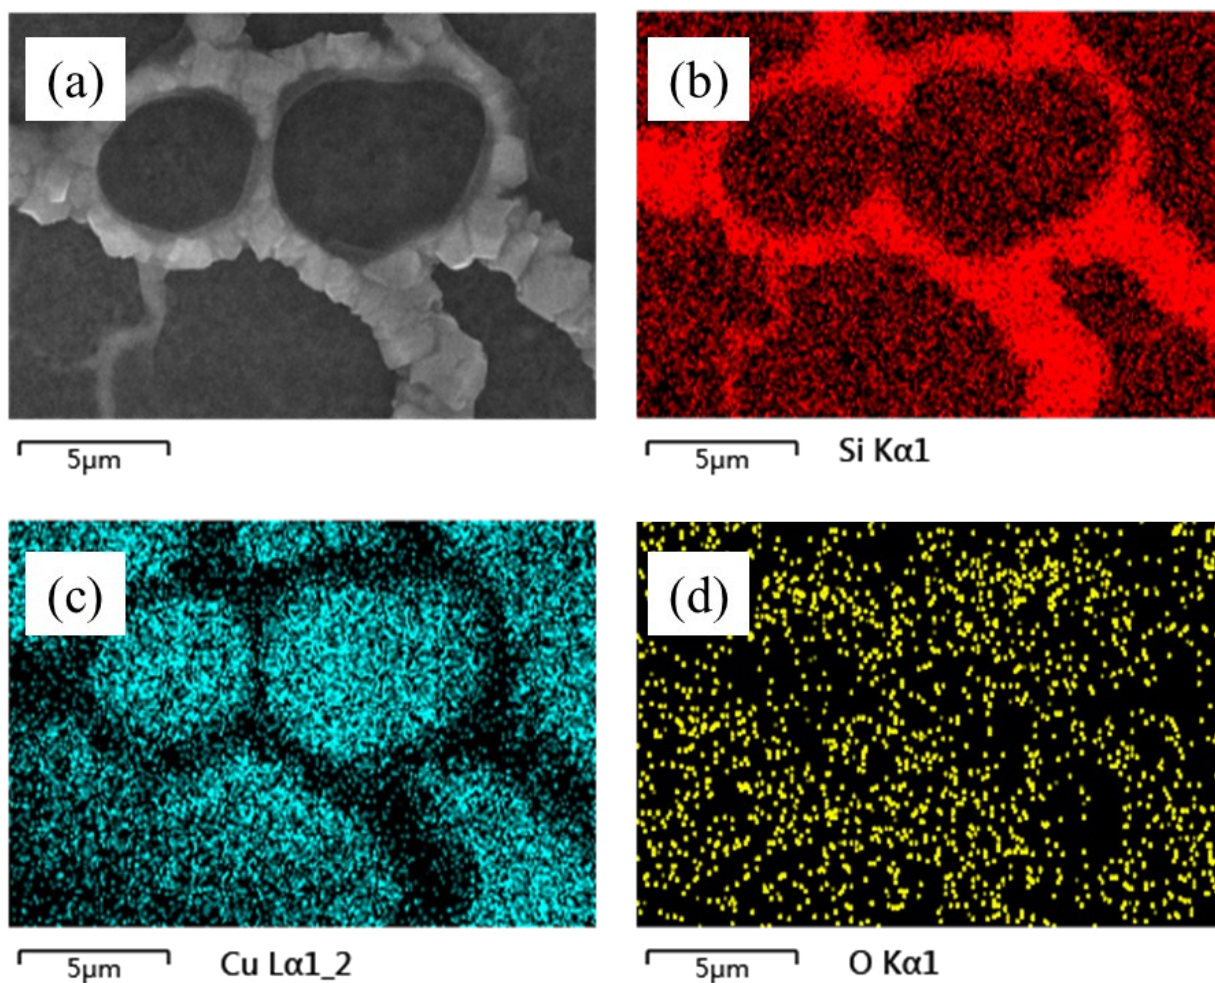

**Fig. S5** (a) SEM and corresponding EDS elemental (b, Si; c, Cu; d O) mapping images of the Si deposited on disturbed Ga (*l*) electrode at -2.3 V (*vs.* Ag QRE). The Cu as conductive adhesive for SEM test



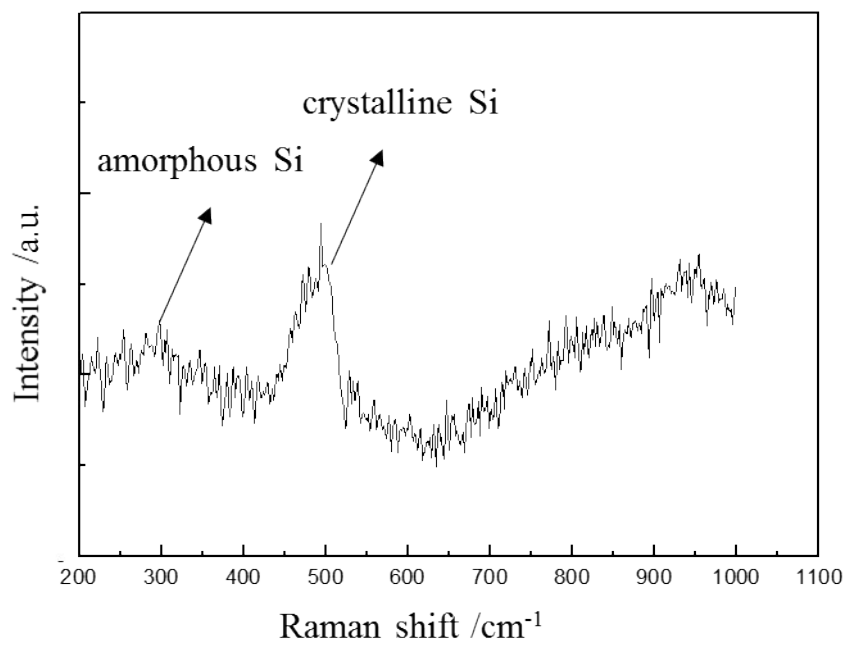

**Fig. S6** Raman spectrum of the as-prepared Si

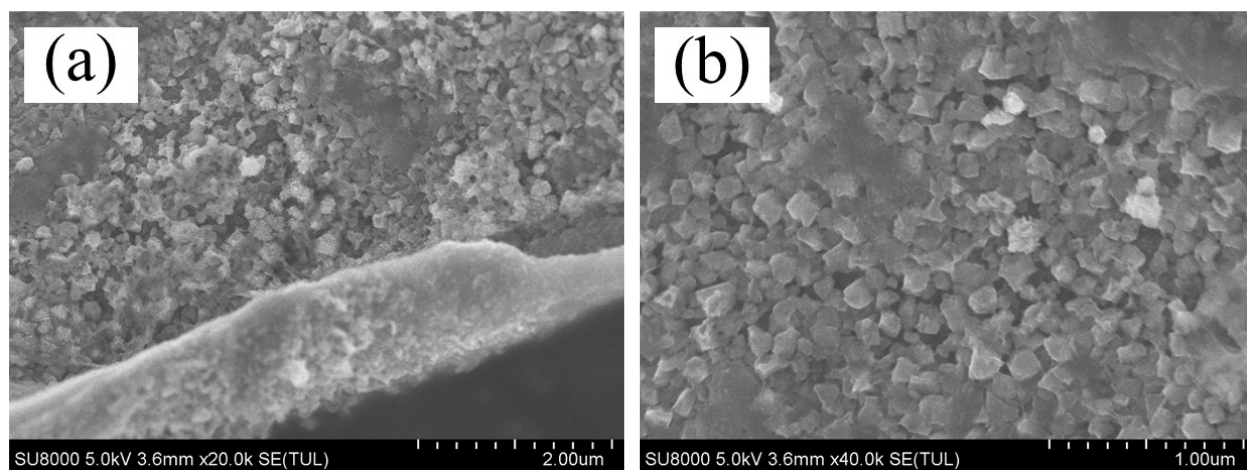

**Fig. S7** SEM images with different magnifications of the deposits prepared on the liquid metal electrode in the IL of [PP<sub>13</sub>][TFSI]. Crystalline Si grown at a potential of -2.1 V (vs. Ag QRE) at 100 °C for 8 h

References:

1. J. G. Huddleston, A. E. Visser, W. M. Reichert, H. D. Willauer, G. A. Broker and R. D. Rogers, *Green Chem.*, 2001, **3**, 156.
2. M. Shamsipur, A. A. M. Beigi, M. Teymouri, S. M. Pourmortazavi and M. Irandoust, *J. Mol. Liq.*, 2010, **157**, 43.
3. D. Y. Xing, N. Peng and T. S. Chung, *Ind. Eng. Chem. Res.*, 2010, **49**, 8761.
4. A. E. Andreatta, A. Arce, E. Rodil and A. Soto, *J. Solution Chem.*, 2010, **39**, 371.
5. I. Bandres, B. Giner and I. Gascon, *J. Phys. Chem. B*, 2008, **112**, 12461.
6. P. Y. Chen and C. L. Hussey, *Electrochim Acta*, 2004, **49**, 5125.
